# Supplementary material for: Gallium nanoparticles facilitate phagosome maturation and inhibit growth of virulent Mycobacterium tuberculosis in macrophages
Source: PubMed Central journal article supplement (PMC5436895; doi:10.1371/journal.pone.0177987), 2017-05-18

F127-COOH  
CDCl<sub>3</sub>

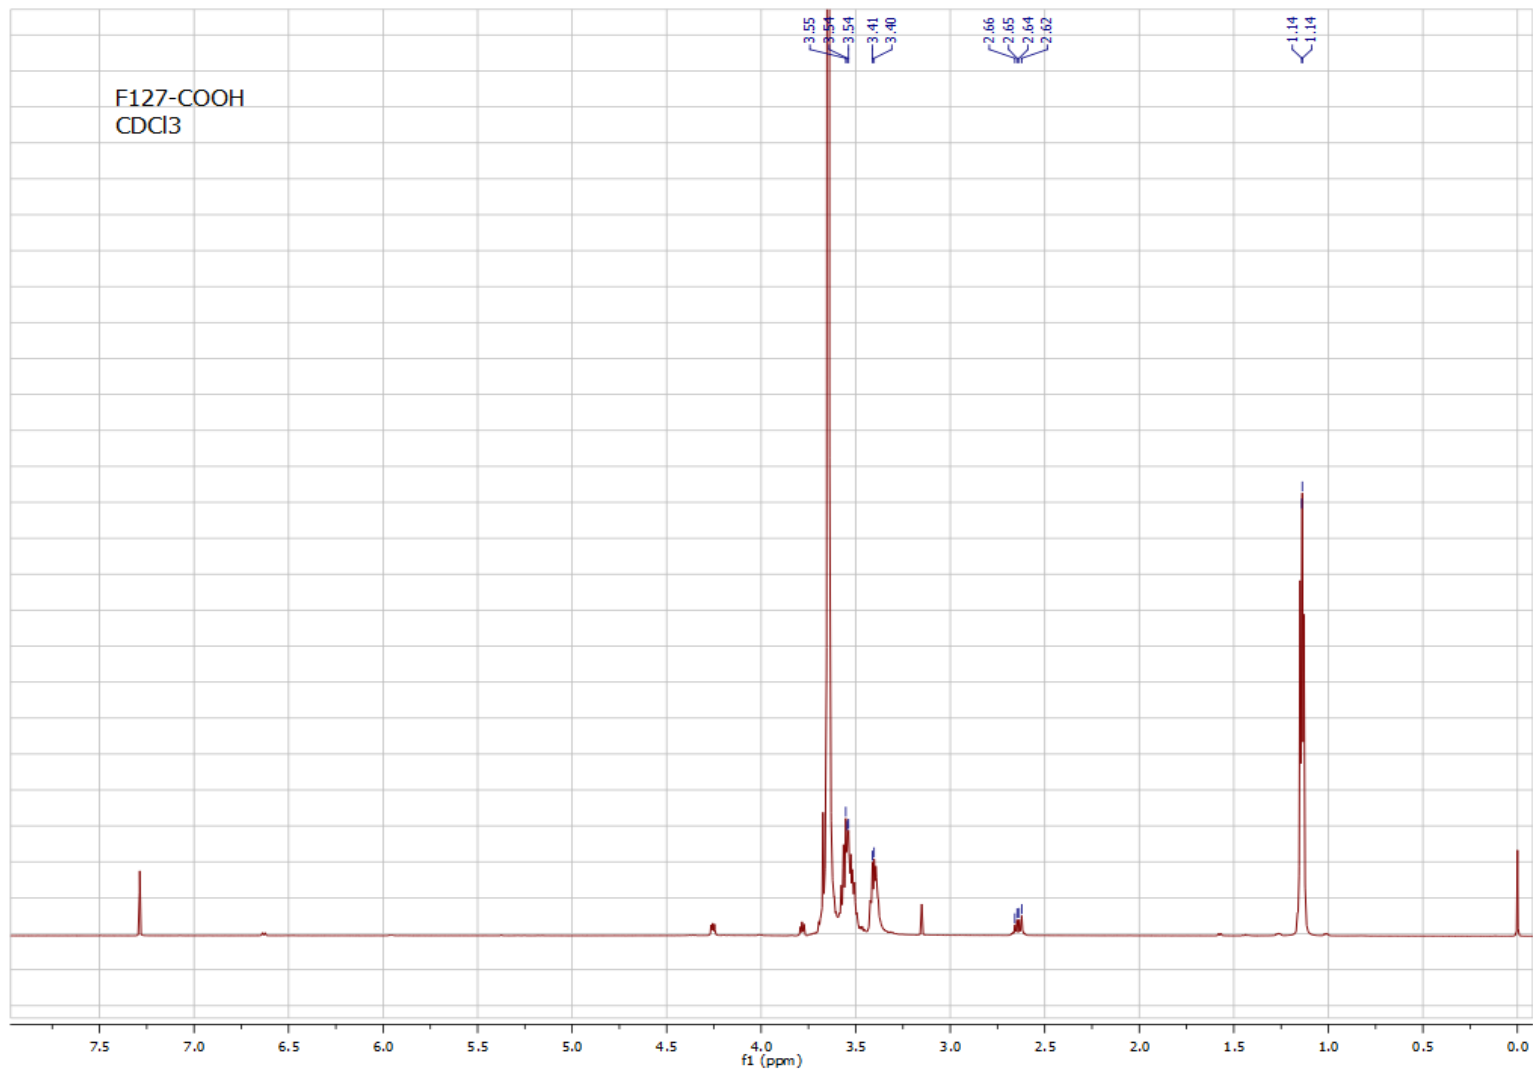

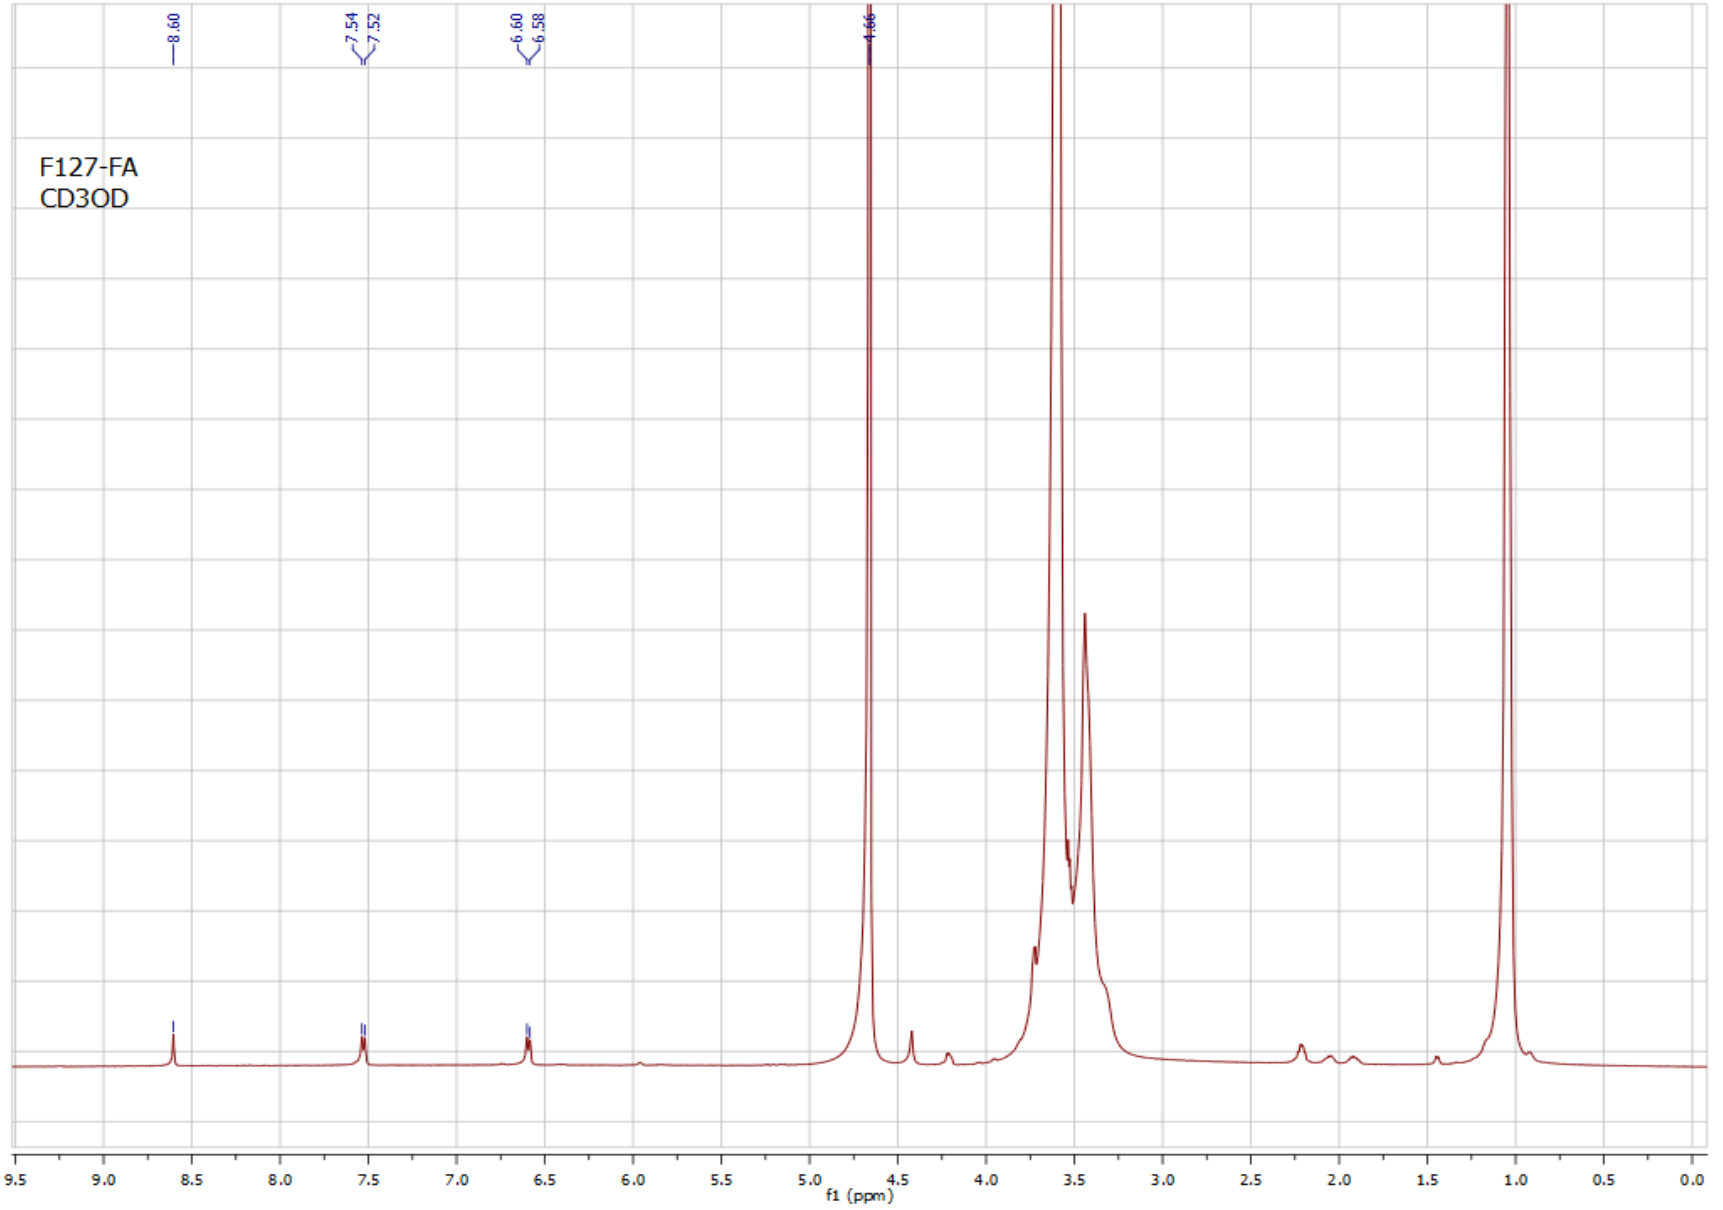

F127-mannose  
DMSO-d6

6.21

5.56

5.55

4.86

4.58

4.39

4.29

4.13

2.79

2.75

2.53

2.49

7.5 7.0 6.5 6.0 5.5 5.0 4.5 4.0 3.5 3.0 2.5 2.0 1.5 1.0 0.5 0.0

f1 (ppm)

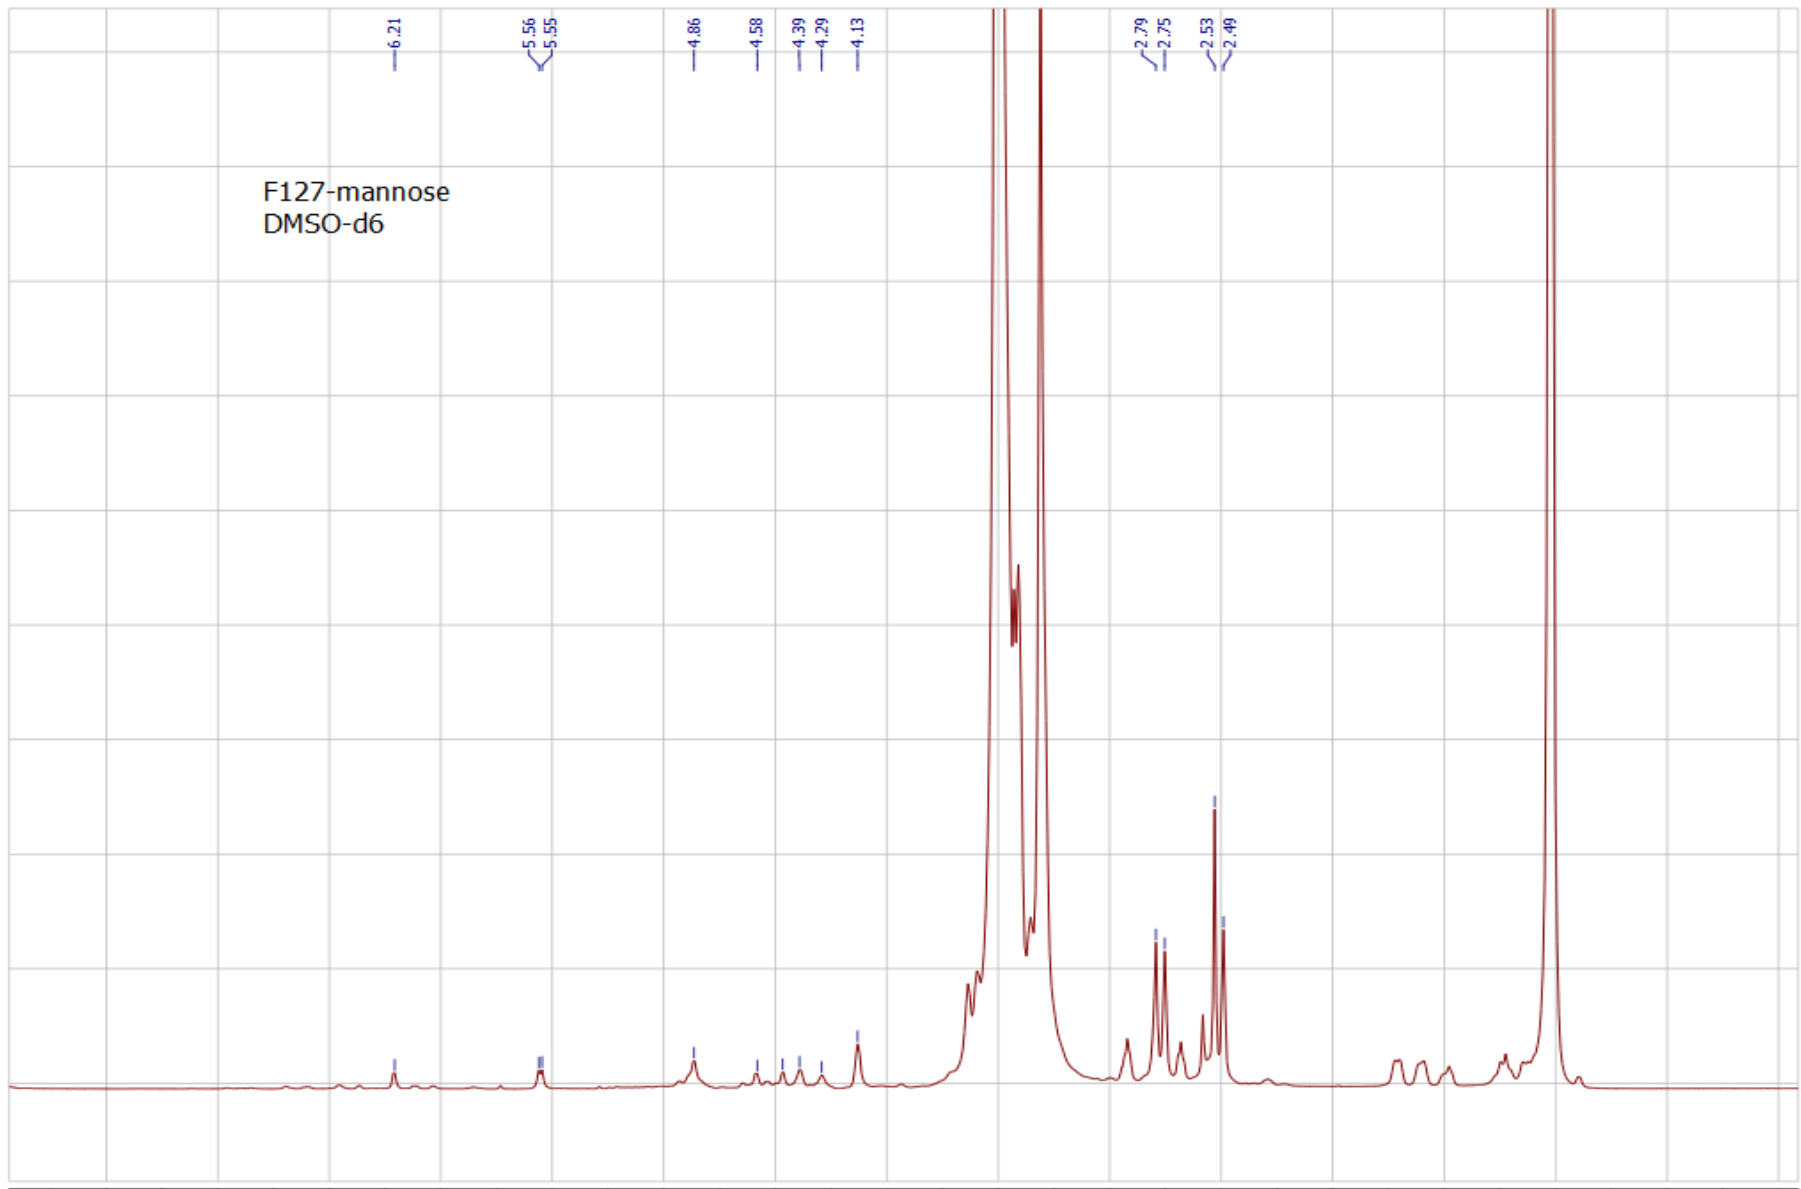

Supplement: pone.0177987.s002.pdf [file pone.0177987.s002.pdf]
